# Supplementary material
Source: PubMed Central journal article supplement (PMC10491415)
Supplement: NIHMS1894145-supplement-Supplemental_Digital_Content_1.pdf [file NIHMS1894145-supplement-Supplemental_Digital_Content_1.pdf]

## Appendix 1. Definitions of PAS Markers in the Second and Third Trimesters of Pregnancy

| Marker                                        | Definition                                                                                                                                                                                                                                                                                                                                                                                                                   |
|-----------------------------------------------|------------------------------------------------------------------------------------------------------------------------------------------------------------------------------------------------------------------------------------------------------------------------------------------------------------------------------------------------------------------------------------------------------------------------------|
| Placental lacunae                             | Irregular, hypoechoic spaces within the placenta containing vascular flow (which can be seen on grayscale and/or color Doppler imaging). The following lacunae findings are associated with a high risk of PAS:<br>Multiple (often defined as $\geq 3$ )<br><ol style="list-style-type: none"> <li>1. Large size</li> <li>2. Irregular borders</li> <li>3. High velocity<sup>a</sup> and/or turbulent flow within</li> </ol> |
| Abnormal uteroplacental interface             | Loss of retroplacental hypoechoic zone between the placenta and myometrium. <sup>b</sup><br>This marker is often located along the posterior bladder wall resulting in partial or complete interruption or irregularities of the uterovesical interface.<br>Thinning or of the retroplacental myometrium (previously described as myometrial thickness of $< 1$ mm).                                                         |
| Abnormal uterine contour (or placental bulge) | Placental tissue distorting the uterine contour resulting in a bulge-like appearance.                                                                                                                                                                                                                                                                                                                                        |
| Exophytic mass                                | Placental tissue extruding beyond the uterine serosa.                                                                                                                                                                                                                                                                                                                                                                        |
| Bridging vessel                               | Vessel that extends from the placenta across the myometrium and beyond the uterine serosa.                                                                                                                                                                                                                                                                                                                                   |

PAS, placenta accreta spectrum.

<sup>a</sup>Some studies suggest a velocity of  $> 15$  cm/s as the threshold for high peak systolic velocity;

<sup>b</sup>This space represents the uterine decidua and has been described as the “clear zone.”

Reprinted from Shanker SA, Coleman B, Timor-Tritsch IE, Bhide A, Bromley B, Cahill AG, et al. Special Report of the Society for Maternal-Fetal Medicine Placenta Accreta Spectrum Ultrasound Marker Task Force: Consensus on definition of markers and approach to the ultrasound examination in pregnancies at risk for placenta accreta spectrum. *Am J Obstet Gynecol* 2021;224(1):B2-B14. doi: 10.1016/j.ajog.2020.09.001. Erratum in: *Am J Obstet Gynecol* 2021 Jul;225(1):91. Copyright 2021, with permission from Elsevier.
